# Supplementary material
Source: publisher figshare collection journal article supplement (https://acs.figshare.com/ndownloader/files/22645859)
Supplement: Supplementary file 1 [file 22645859]

## Sheet: Induced-fit compounds
Target kinase	Compound ID	Compound SMILES
S6K	CHEMBL6291	Cn1cc(C2=C(C(=O)NC2=O)c3cn(CCCSC(=N)N)c4ccccc34)c5ccccc15
S6K	CHEMBL3685220	NC(=O)c1cccc2c(NCc3cccc(c3)N4C(=O)Nc5ccccc5C4=O)ncnc12
S6K	CHEMBL3680430	COCCC(Nc1ncnc2c(cccc12)C(=O)N)c3cccc(NC(=O)c4cc(n[nH]4)C5CC5)c3
S6K	CHEMBL3685220	NC(=O)c1cccc2c(NCc3cccc(c3)N4C(=O)Nc5ccccc5C4=O)ncnc12
S6K	CHEMBL3675398	CNCC(Nc1ncnc2c(cccc12)C(=O)N)c3cccc(NC(=O)c4ccc(F)c(F)c4)c3
MKNK1	CHEMBL3355002	CC(C)Oc1cc2[nH]ncc2cc1Nc3ncnc4[nH]c5CCC(Cc5c34)C(=O)NCCCS(=O)(=O)C
MKNK1	CHEMBL3355000	COc1cc2[nH]ncc2cc1Nc3ncnc4[nH]c5CCC(Cc5c34)C(=O)NCc6ccccc6
MKNK1	CHEMBL3354998	CC(C)Oc1cc2[nH]ncc2cc1Nc3ncnc4[nH]c5CCCCc5c34
MKNK1	CHEMBL223360	Cc1ccc(F)c(NC(=O)Nc2ccc(cc2)c3cccc4[nH]nc(N)c34)c1
MKNK1	CHEMBL3659492	Cc1c(sc2ncnc(Nc3ccc(F)cc3OC4CCN(CC(=O)N5CCOCC5)CC4)c12)C(=O)N
MKNK1	CHEMBL3417208	CN1C=C(Nc2ncnc3sc(C(=O)N)c(C)c23)C=CC1=O
MKNK1	CHEMBL1721885	Cc1[nH]c(\C=C\2/C(=O)Nc3ccc(F)cc23)c(C)c1C(=O)NC[C@H](O)CN4CCOCC4
MKNK1	CHEMBL226403	O=C1NCCc2[nH]c(cc12)c3ccnc(c3)c4cnc5ccccc5c4
MKNK1	CHEMBL3632739	COC(=O)c1sc2ncnc(Nc3ccc(F)cc3OC(C)C)c2c1C
MKNK1	CHEMBL3805029	FC(F)(F)c1cc(NC(=O)COc2ccc(cc2)c3cccnc3)ccc1CN4CCNCC4
LKB1	CHEMBL502835	COC(=O)c1ccc2\C(=C(\Nc3ccc(cc3)N(C)C(=O)CN4CCN(C)CC4)/c5ccccc5)\C(=O)Nc2c1
LKB1	CHEMBL603469	C[C@]12O[C@H](C[C@]1(O)CO)n3c4ccccc4c5c6C(=O)NCc6c7c8ccccc8n2c7c35
LKB1	CHEMBL1908397	O=C(N1CCNCC1)c2ccc(\C=C\c3n[nH]c4ccccc34)cc2
LKB1	CHEMBL535	CCN(CC)CCNC(=O)c1c(C)[nH]c(\C=C\2/C(=O)Nc3ccc(F)cc23)c1C
LKB1	CHEMBL1287853	Cc1cnc(Nc2ccc(OCCN3CCCC3)cc2)nc1Nc4cccc(c4)S(=O)(=O)NC(C)(C)C
LKB1	CHEMBL388978	CN[C@@H]1C[C@H]2O[C@@](C)([C@@H]1OC)n3c4ccccc4c5c6CNC(=O)c6c7c8ccccc8n2c7c35
